# Supplementary material
Source: publisher figshare collection journal article supplement (https://acs.figshare.com/ndownloader/files/3612201)
Supplement: Supplementary file 1 [file 3612201]

# The Generation and Characterisation of Standardised Forms of Trehalose Dihydrate and their Associated Solid-State Behaviour

Bahijja T. Raimi-Abraham <sup>§</sup>, Jonathan G. Moffat <sup>†</sup>, Peter S. Belton <sup>‡</sup>, Susan A. Barker <sup>§</sup>,  
Duncan Q.M. Craig<sup>\*, §</sup>

## AUTHOR ADDRESS

<sup>§</sup> UCL School of Pharmacy, 29-39 Brunswick Square, London, WC1N 1AX

<sup>†</sup> Oxford Instruments, Tubney Woods, Abingdon, Oxfordshire OX13 5QX

<sup>‡</sup> School of Chemistry, University of East Anglia, Norwich Research Park, Norwich, NR4  
7TJ

**KEYWORDS** Trehalose dihydrate, polymorphism, hydrate, carbohydrates, DSC

\*Correspondence: duncan.craig@ucl.ac.uk

**Variable Temperature Attenuated Total Reflection Fourier Transform Infrared spectroscopy (Variable temperature ATR-FTIR).**

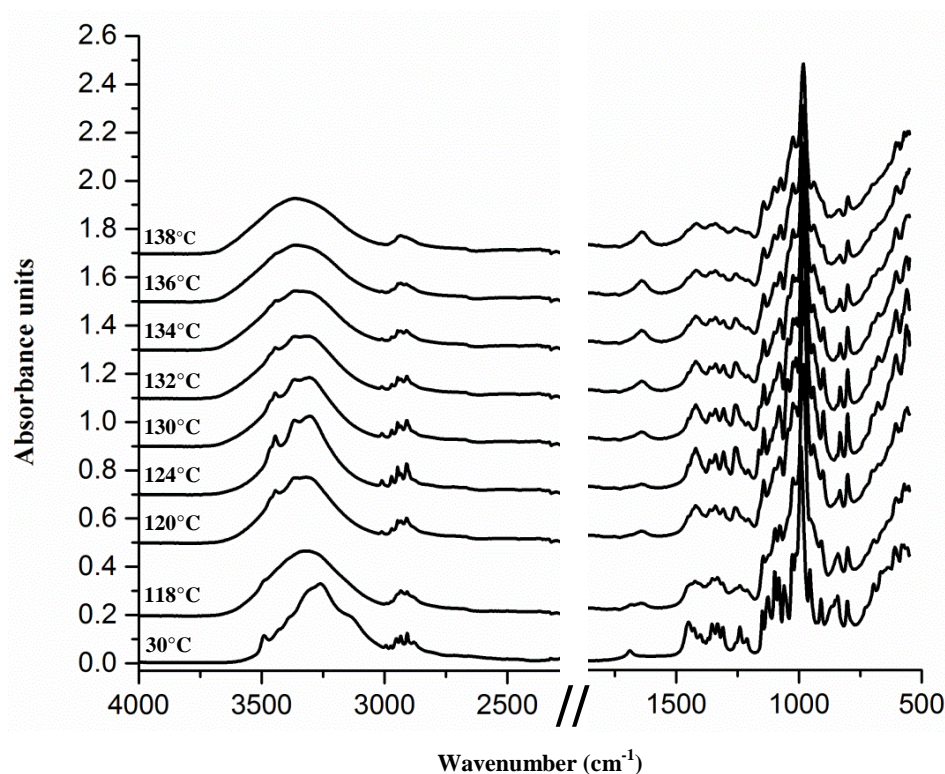

**Figure S11.** Variable temperature ATR-FTIR spectra of  $T_{h2}$  measured using a constant heating rate of  $2^{\circ}\text{C}/\text{min}$  in the  $500 - 1750\text{ cm}^{-1}$  and  $1000 - 4000\text{ cm}^{-1}$  region at  $30, 118, 120, 124$  and  $130-138^{\circ}\text{C}$ .

**Table S11.** ATR-FTIR band assignment for  $T_{h2}$  at  $124^{\circ}\text{C}$  samples

| Absorption band ( $\text{cm}^{-1}$ )                                   | Assignment <sup>13, 31-37</sup>                                                                                               |
|------------------------------------------------------------------------|-------------------------------------------------------------------------------------------------------------------------------|
| <b><math>T_{h2}</math> spectra at <math>124^{\circ}\text{C}</math></b> |                                                                                                                               |
| 3446<br><b>3366</b>                                                    | O-H stretch vibration of two crystal water molecules with Hydrogen bonding                                                    |
| 3303                                                                   | O-H stretching of trehalose                                                                                                   |
| <b>3010<sup>b</sup></b><br>2970<br>2947<br>2933<br>2909                | Asymmetrical and symmetrical stretching of the C-H ring                                                                       |
| 1652                                                                   | Bending peak of crystal water                                                                                                 |
| 981<br>941                                                             | Two vibrational modes (asymmetrical and symmetrical) of the $\alpha, \alpha\text{-}1\leftrightarrow 1\text{-glycosidic}$ bond |
| 929 (shoulder peak)<br><b>901<sup>b</sup></b>                          | Coupled bending vibrations of C1-H, $\text{CH}_2$ and C-O-H                                                                   |
| <b>832<sup>a</sup></b><br>-                                            | Bending vibration of equatorial C-H bonds in $\alpha$ anomers                                                                 |
